# Supplementary material
Source: HighWire-hosted journal article supplement (https://erj.ersjournals.com/content/60/4/2201435)

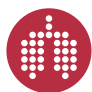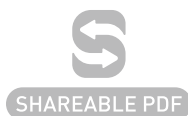

# Effect of prone positioning without mechanical ventilation in COVID-19 patients with acute respiratory failure

Yanfei Shen, Shangzhong Chen and Caibao Hu

Department of Intensive Care, Zhejiang Hospital, Hangzhou, People's Republic of China.

Corresponding author: Caibao Hu ([zjicu1996@163.com](mailto:zjicu1996@163.com))

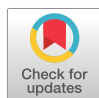

Shareable abstract (@ERSpublications)

The mechanism of prone positioning in COVID-19 is quite different from that in ARDS and the severity of respiratory failure plays a key role in the efficacy of prone positioning in COVID-19 <https://bit.ly/3Qf9Prw>

**Cite this article as:** Shen Y, Chen S, Hu C. Effect of prone positioning without mechanical ventilation in COVID-19 patients with acute respiratory failure. *Eur Respir J* 2022; 60: 2201435 [DOI: 10.1183/13993003.01435-2022].

This single-page version can be shared freely online.

Copyright ©The authors 2022.

This version is distributed under the terms of the Creative Commons Attribution Non-Commercial Licence 4.0. For commercial reproduction rights and permissions contact [permissions@ersnet.org](mailto:permissions@ersnet.org)

Received: 18 July 2022  
Accepted: 28 July 2022

*To the Editor:*

The efficacy of prone positioning (PP) without mechanical ventilation in coronavirus disease 2019 (COVID-19) patients with acute respiratory failure (ARF) remains uncertain. In a recent trial including 827 non-intubated COVID-19 patients with high baseline peripheral arterial oxygen saturation ( $S_{pO_2}$ )/inspiratory oxygen fraction ( $F_{IO_2}$ ) (around 200), PEREZ-NIETO *et al.* [1] reported that PP use was associated with lower intubation and mortality risk. However, other two large trials [2, 3] have conversely reported that compared with usual care, PP showed no benefit among non-intubated COVID-19 patients with ARF. The reasons for these inconsistent findings remain unknown. We noted that a subgroup analysis of one trial [3] reporting negative outcomes found that PP was associated with decreased intubation rate in the subgroup with  $S_{pO_2}/F_{IO_2} > 150$  (HR 0.44, 95% CI 0.23 to 0.87), while this was nonsignificant in the subgroup with  $S_{pO_2}/F_{IO_2} < 150$  (p-value for interaction 0.03). In addition, the baseline  $S_{pO_2}/F_{IO_2}$  is also higher in the trial reporting positive outcomes [1] than in the trial with negative findings [3] (baseline  $S_{pO_2}/F_{IO_2}$  200 [1] versus 135 [3]).

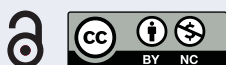

Supplement: inline-supplementary-material-1 [file inline-supplementary-material-1.pdf]
